# Supplementary material
Source: PubMed Central journal article supplement (PMC3876752)
Supplement: peds.2012-3584_peds.2012-3584SupplementaryData.pdf [file peds.2012-3584_peds.2012-3584SupplementaryData.pdf]

## Supplemental Information

**SUPPLEMENTAL TABLE 5** NHANES 1999–2010 Characteristics: ALT and MetS Information, by Race/Ethnicity and Weight Category

|                    | <i>n</i> | Mean ALT<br>(95% CI) | Percent With High<br>(>30) ALT (95% CI) | Percent With<br>MetS (95% CI) |
|--------------------|----------|----------------------|-----------------------------------------|-------------------------------|
| Non-Hispanic white |          |                      |                                         |                               |
| Underweight/normal | 821      | 17.3 (16.7–17.8)     | 3.2 (2.0–4.4)                           | 1.5 (0.6–2.4)                 |
| Overweight         | 179      | 19.8 (18.7–21.0)     | 10.4 (5.8–15.0)                         | 8.0 (3.3–12.6)                |
| Obese              | 205      | 25.6 (23.6–27.7)     | 27.9 (20.9–34.9)                        | 35.6 (28.6–42.6)              |
| Non-Hispanic black |          |                      |                                         |                               |
| Underweight/normal | 730      | 16.5 (15.7–17.2)     | 3.6 (1.7–5.6)                           | 0.2 (0.0–0.5)                 |
| Overweight         | 223      | 18.2 (17.2–19.3)     | 5.8 (2.5–9.2)                           | 2.0 (0.0–4.3)                 |
| Obese              | 280      | 20.2 (18.7–21.6)     | 9.4 (5.2–13.7)                          | 15.8 (11.4–20.1)              |
| Hispanic           |          |                      |                                         |                               |
| Underweight/normal | 994      | 18.1 (17.5–18.7)     | 6.8 (4.6–9.0)                           | 1.1 (0.1–2.0)                 |
| Overweight         | 317      | 24.3 (19.5–29.2)     | 12.4 (8.2–16.7)                         | 8.0 (5.0–11.1)                |
| Obese              | 372      | 29.6 (27.2–32.0)     | 32.4 (26.3–38.5)                        | 37.5 (30.1–44.9)              |

CI, confidence interval.

**SUPPLEMENTAL TABLE 6** NHANES 1999–2010 Characteristics: Mean (95% Confidence Interval) Values of Relevant Measures Among Children Aged 12 to 19 Years

|                    | n    | Mean (95% Confidence Interval) |                          |                  |                     |                  |                  |               |                  |                  |               |                  |
|--------------------|------|--------------------------------|--------------------------|------------------|---------------------|------------------|------------------|---------------|------------------|------------------|---------------|------------------|
|                    |      | Waist, cm                      | High-Density Lipoprotein | Triglycerides    | SBP                 | Glucose          | Insulin          | HOMA-IR       | ALT              | AST              | hsCRP         | GGT              |
| Overall            | 4124 | 81.3 (80.6–82.0)               | 51.3 (50.8–51.9)         | 88.6 (86.0–91.2) | 109.5 (108.9–110.2) | 93.1 (92.6–93.5) | 11.4 (10.9–11.8) | 2.7 (2.5–2.8) | 19.4 (18.9–19.8) | 23.8 (23.4–24.1) | 1.6 (1.4–1.8) | 15.1 (14.4–15.8) |
| By Gender          |      |                                |                          |                  |                     |                  |                  |               |                  |                  |               |                  |
| Females            | 1946 | 80.7 (79.7–81.7)               | 53.6 (52.8–54.4)         | 86.3 (82.5–90.1) | 106.6 (105.8–107.3) | 91.2 (90.6–91.9) | 11.6 (11.0–12.2) | 2.7 (2.5–2.8) | 16.6 (16.2–17.0) | 21.4 (21.0–21.8) | 1.8 (1.5–2.2) | 13.0 (12.5–13.5) |
| Males              | 2178 | 81.8 (80.9–82.8)               | 49.2 (48.4–49.9)         | 90.8 (87.3–94.2) | 112.4 (111.6–113.1) | 94.8 (94.4–95.3) | 11.1 (10.5–11.8) | 2.7 (2.5–2.8) | 22.0 (21.3–22.8) | 26.0 (25.4–26.5) | 1.4 (1.2–1.5) | 17.1 (16.1–18.1) |
| P <sup>a</sup>     |      | .0837                          | <.0001                   | .0819            | <.0001              | <.0001           | .3045            | .9214         | <.0001           | <.0001           | .0174         | <.0001           |
| By race/ethnicity  |      |                                |                          |                  |                     |                  |                  |               |                  |                  |               |                  |
| Non-Hispanic white | 1207 | 81.0 (80.0–82.0)               | 50.6 (49.8–51.3)         | 92.1 (88.6–95.5) | 109.2 (108.3–110.0) | 93.2 (92.7–93.7) | 10.5 (10.0–11.1) | 2.5 (2.3–2.6) | 19.1 (18.5–19.7) | 23.5 (23.1–24.0) | 1.5 (1.2–1.7) | 14.4 (13.5–15.4) |
| Non-Hispanic black | 1233 | 80.6 (79.3–81.8)               | 55.6 (54.5–56.7)         | 67.3 (64.9–69.7) | 111.9 (111.1–112.6) | 91.2 (90.6–91.8) | 12.6 (11.9–13.4) | 2.9 (2.7–3.1) | 17.7 (17.1–18.3) | 24.0 (23.4–24.5) | 1.7 (1.5–1.9) | 17.1 (16.1–18.0) |
| Hispanic           | 1684 | 82.9 (81.9–84.0)               | 50.6 (49.9–51.3)         | 93.3 (88.0–98.5) | 108.8 (108.0–109.6) | 94.2 (93.4–95.0) | 13.3 (12.5–14.1) | 3.1 (2.9–3.3) | 21.8 (20.7–23.0) | 24.4 (23.8–24.9) | 2.0 (1.7–2.2) | 15.9 (14.8–16.9) |
| P <sup>a</sup>     |      | .0054                          | <.0001                   | <.0001           | <.0001              | <.0001           | <.0001           | <.0001        | <.0001           | .0923            | .0296         | .0013            |

AST, aspartate aminotransferase.

<sup>a</sup> t test/analysis of variance comparing mean values by gender and race/ethnicity, respectively.
